# Supplementary material for: Anticancer and Antibacterial Activity Studies of Gold(I)-Alkynyl Chromones
Source: PubMed Central journal article supplement (PMC6331995; doi:10.3390/molecules201119647), 2015-10-30
Supplement: molecules-20-19647-s001.pdf [file molecules-20-19647-s001.pdf]

## Supplementary Informations

### 1. DNA Comet Assay

Single cells were embedded in an agarose gel, then treated with lysis buffer, subjected to electrophoresis, stained with a DAPI (4',6-diamidino-2-phenylindole) solution and analyzed under a fluorescent microscope. Image of a single cell resembles the shape of a comet in which the circular head and tail can be distinguished. The head of the comet consists of a undamaged high molecular weight DNA which in the conditions used does not migrate during the electrophoresis into agarose gel. Damaged DNA of low molecular weight migrates in the tail of the comet in the direction of the anode [58].

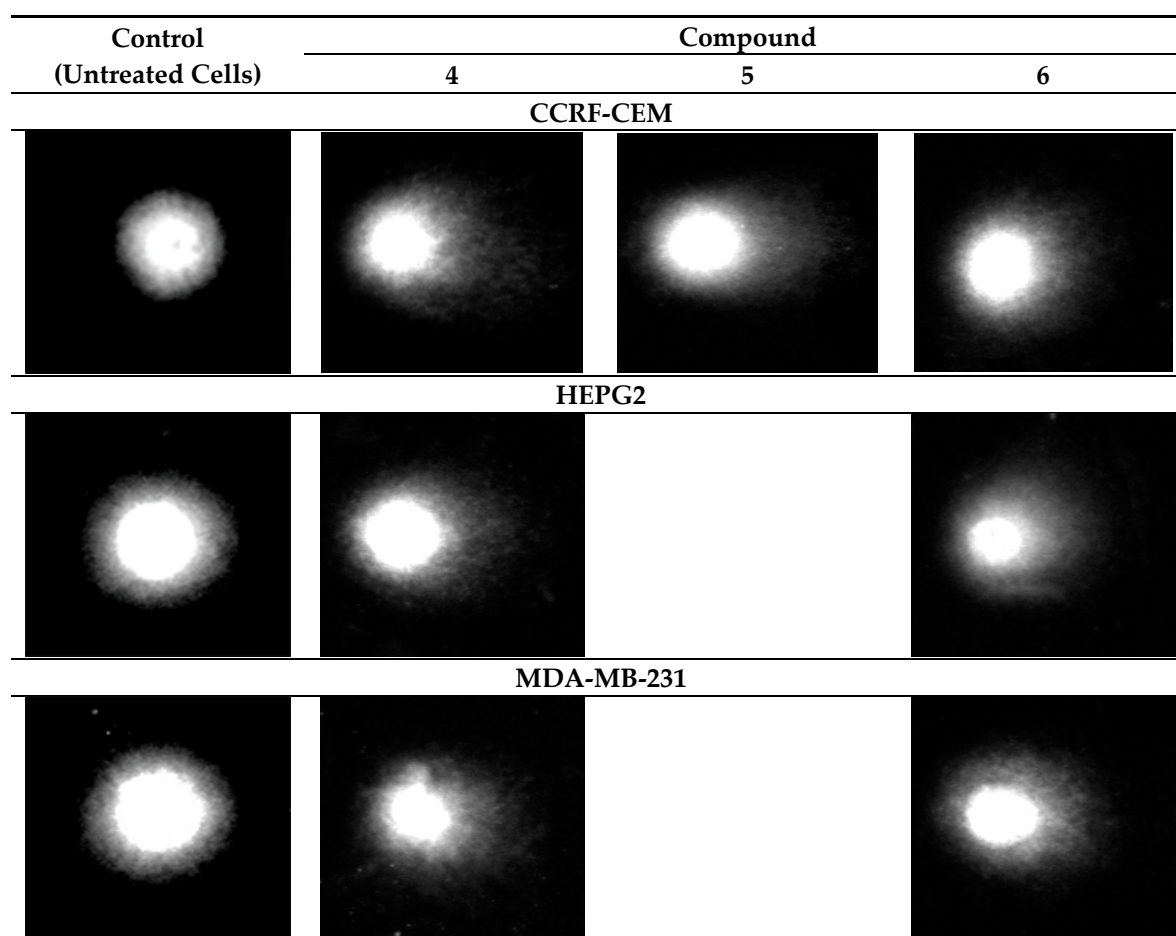

**Figure S1.** DNA comets obtained from human cancer cells treated for 24 h with complexes 4, 5 and 6 (single-cell electrophoresis). Pictures taken under a fluorescence microscope (Nikon Eclipse, Tokyo, Japan).

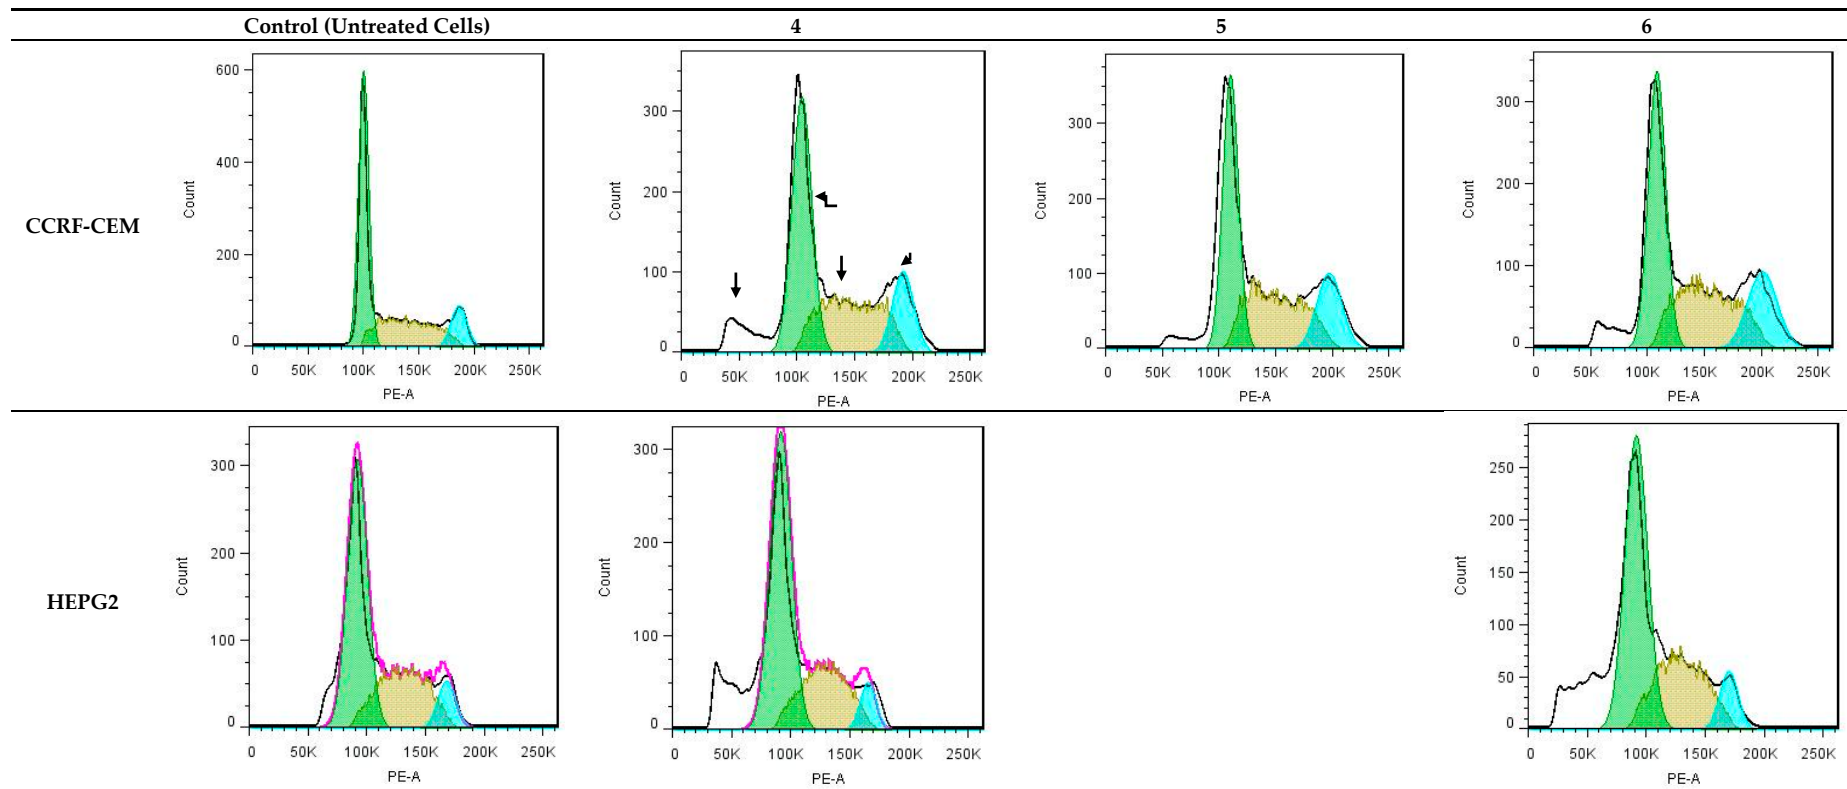

Figure S2. Cont.

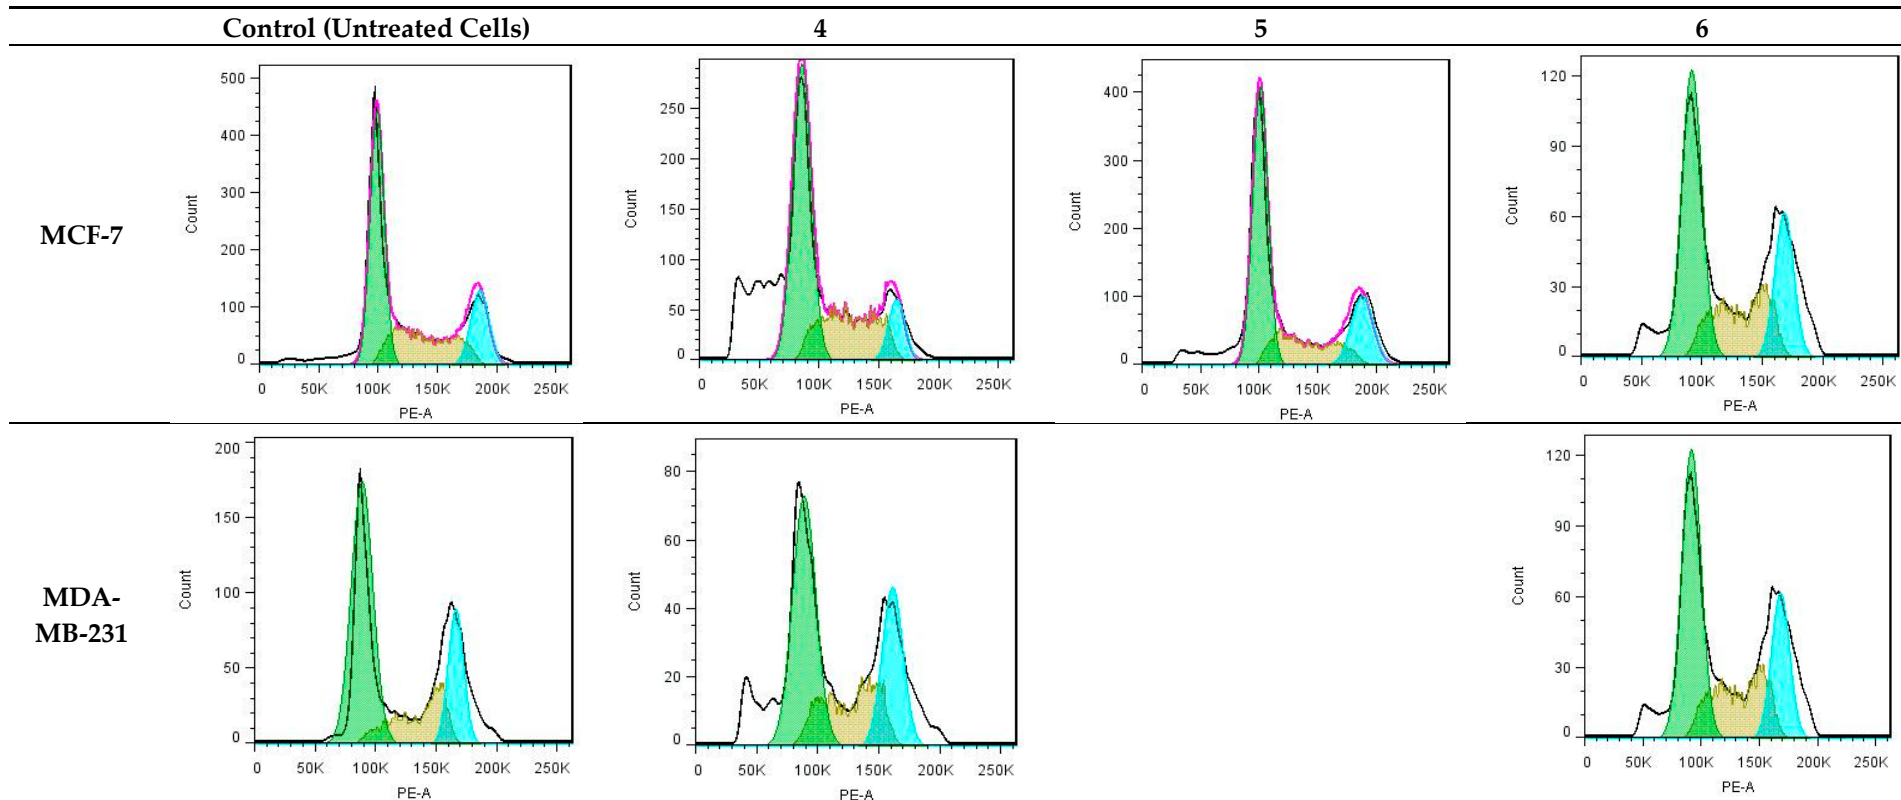

**Figure S2.** DNA histograms obtained by flow cytometry assay of leukemic (CCRF-CEM) and solid cancer cells (HepG2, MCF-7 and MDA-MB-231) treated for 24 h with complexes 4, 5 and 6.

**Table S1.** Crystallographic and structure refinement parameters for **5**·CH<sub>2</sub>Cl<sub>2</sub>·0.5 C<sub>4</sub>H<sub>10</sub> and **6**.

|                                             | <b>5</b> ·CH <sub>2</sub> Cl <sub>2</sub> ·0.5 C <sub>4</sub> H <sub>10</sub> | <b>6</b>                                           |
|---------------------------------------------|-------------------------------------------------------------------------------|----------------------------------------------------|
| Chemical formula                            | C <sub>48</sub> H <sub>46</sub> AuCl <sub>2</sub> FeNO <sub>3</sub> P         | C <sub>35</sub> H <sub>24</sub> AuO <sub>2</sub> P |
| Formula weight                              | 1039.54                                                                       | 704.48                                             |
| Crystal system                              | Monoclinic                                                                    | Monoclinic                                         |
| Space group                                 | <i>P</i> 2 <sub>1</sub> / <i>c</i> (no. 14)                                   | <i>P</i> 2 <sub>1</sub> / <i>c</i> (no. 14)        |
| Crystal color and shape                     | Orange block                                                                  | Colorless block                                    |
| Crystal size                                | 0.25 × 0.22 × 0.21                                                            | 0.20 × 0.19 × 0.17                                 |
| <i>a</i> (Å)                                | 10.8484(6)                                                                    | 14.0444(6)                                         |
| <i>b</i> (Å)                                | 15.1395(5)                                                                    | 12.6413(5)                                         |
| <i>c</i> (Å)                                | 25.8631(12)                                                                   | 32.0520(12)                                        |
| β (°)                                       | 90.475(4)                                                                     | 101.487(3)                                         |
| <i>V</i> (Å <sup>3</sup> )                  | 4247.6(3)                                                                     | 5576.5(4)                                          |
| <i>Z</i>                                    | 4                                                                             | 8                                                  |
| <i>T</i> (K)                                | 173(2)                                                                        | 173(2)                                             |
| <i>D</i> <sub>c</sub> (g·cm <sup>-3</sup> ) | 1.626                                                                         | 1.678                                              |
| μ (mm <sup>-1</sup> )                       | 3.998                                                                         | 5.364                                              |
| Scan range (°)                              | 1.56 < θ < 29.23                                                              | 1.48 < θ < 29.26                                   |
| Unique reflections                          | 11509                                                                         | 15096                                              |
| Observed refls [I > 2σ(I)]                  | 7473                                                                          | 8310                                               |
| <i>R</i> <sub>int</sub>                     | 0.0839                                                                        | 0.0905                                             |
| Final <i>R</i> indices [I > 2σ(I)] *        | 0.0358, <i>wR</i> <sub>2</sub> 0.0706                                         | 0.0300, <i>wR</i> <sub>2</sub> 0.0367              |
| <i>R</i> indices (all data)                 | 0.0715, <i>wR</i> <sub>2</sub> 0.0766                                         | 0.0841, <i>wR</i> <sub>2</sub> 0.0423              |
| Goodness-of-fit                             | 0.837                                                                         | 0.703                                              |
| Max, Min Δ <i>q</i> /e (Å <sup>-3</sup> )   | 1.550, -0.942                                                                 | 1.103, -1.104                                      |

\* Structures were refined on  $F_0^2$ :  $wR_2 = [\sum[w(F_0^2 - F_c^2)^2]/\sum w(F_0^2)^2]^{1/2}$ , where  $w^{-1} = [\sum(F_0^2) + (aP)^2 + bP]$  and  $P = [\max(F_0^2, 0) + 2F_c^2]/3$ .
